# Supplementary material for: Development of high spatial resolution annual emission inventory of greenhouse gases from open straw burning in Northeast China from 2001 to 2020
Source: Copernicus journal article supplement (doi:10.5194/egusphere-2024-980), 2024-05-03
Supplement: Supplementary file 1 [file egusphere-2024-980-supplement.pdf]

24 **Table S1.** The geographic scope and temporal coverage of the data involved in this study

| Data                                         | Data Sources                                                                                                                                          | Geographic scope                                         | Temporal coverage |
|----------------------------------------------|-------------------------------------------------------------------------------------------------------------------------------------------------------|----------------------------------------------------------|-------------------|
| MODIS fire product (MCD14ML)                 | Fire Information for Resource Management System (FIRMS) ( <a href="https://firms.modaps.eosdis.nasa.gov/">https://firms.modaps.eosdis.nasa.gov/</a> ) | Northeast China                                          | 2001-2020         |
| ChinaCropArea1km                             | <a href="http://www.nesdc.org.cn/">http://www.nesdc.org.cn/</a>                                                                                       | Northeast China                                          | 2001-2019         |
| ChinaCropPhen1km                             | <a href="http://www.nesdc.org.cn/">http://www.nesdc.org.cn/</a>                                                                                       | Northeast China                                          | 2001-2019         |
| HLJ-Soybean-map                              | <a href="https://figshare.com/articles/figure/HLJ_Soybean_map/14776500">https://figshare.com/articles/figure/HLJ_Soybean_map/14776500</a>             | Heilongjiang Province                                    | 2001-2012         |
| Crop classification maps for Northeast China | <a href="https://doi.org/10.6084/m9.figshare.20411424.v1">https:// doi.org/10.6084/m9.figshare.20411424.v1</a>                                        | Northeast China                                          | 2013-2020         |
| Output of major farm products                | National Bureau of Statistics of China (NBSC) ( <a href="http://www.stats.gov.cn/tjsj/ndsj/">http://www.stats.gov.cn/tjsj/ndsj/</a> )                 | Heilongjiang Province, Jilin Province, Liaoning Province | 2001-2020         |
| Rural residential coal consumption           | National Bureau of Statistics of China (NBSC) ( <a href="http://www.stats.gov.cn/tjsj/tjcbw/">http://www.stats.gov.cn/tjsj/tjcbw/</a> )               | Heilongjiang Province, Jilin Province, Liaoning Province | 2001-2020         |

25 Note: Missing data for a certain year were replaced with those of the adjacent year, e.g. the distribution and phenology of corn, rice, and wheat in 2020 are supplemented  
 26 with relevant data from 2019; and we did not calculate the emissions of GHGs from open bean straw burning in Jilin and Liaoning provinces from 2001-2012, due to  
 27 missing data of this section. In addition, since the bean lacked the corresponding phenology data, the mode of emergence and maturity dates of other crops were used  
 28 to supplement. The above data processing process will produce errors, which we would like to clarify here.

29 **Table S2.** Pearson correlation coefficient of CO<sub>2</sub>-eq emissions and straw yield

| Study area      | 2001-2020 | Period I (2001-2012) | Period II (2013-2017) | Period III (2018-2020) |
|-----------------|-----------|----------------------|-----------------------|------------------------|
| Northeast China | 0.707**   | 0.789**              | -                     | -                      |
| Heilongjiang    | 0.655**   | 0.756**              | -                     | -                      |
| Jilin           | 0.749**   | 0.679**              | -                     | -                      |
| Liaoning        | -         | 0.625*               | -                     | -                      |

30 Note: \*\* significance level at  $p < 0.01$ ; \* significance level at  $p < 0.05$

31 **Table S3.** Pearson correlation coefficient of CO<sub>2</sub>-eq emissions and rural residential coal consumption

| Study area      | 2001-2020 | Period I (2001-2012) | Period II (2013-2017) | Period III (2018-2020) |
|-----------------|-----------|----------------------|-----------------------|------------------------|
| Northeast China | 0.747**   | -                    | -                     | -                      |
| Heilongjiang    | 0.644**   | 0.716**              | -                     | -                      |
| Jilin           | 0.689**   | -                    | -                     | -                      |
| Liaoning        | -         | -                    | -                     | -                      |

32 Note: \*\* significance level at  $p < 0.01$ ; \* significance level at  $p < 0.05$

33

34

35

36 **Table S4.** The straw burning bans in Heilongjiang, Jinlin, and Liaoning

| Province     | Number | Year | Straw burning bans                                                                                                                     |
|--------------|--------|------|----------------------------------------------------------------------------------------------------------------------------------------|
| Heilongjiang | 1      | 2015 | Emergency Notice on Further Promoting Straw Burning Banning                                                                            |
|              | 2      | 2016 | Implementation Plan for Heilongjiang Province to Prohibit Burning Straw in the Field to Improve the Quality of Atmospheric Environment |
|              | 3      |      | Notice on Further Strengthening the Province's Straw Burning Banning Control Work                                                      |
|              | 4      | 2018 | Three-year Action Plan for Comprehensive Utilization of Straw in Harbin City, Suihua City, Zhaozhou County and Zhaoyuan County         |
|              | 5      |      | Implementation Plan for Heilongjiang Province to Comprehensive Utilisation of Straw in 2019                                            |
|              | 6      | 2020 | Implementation Plan for Heilongjiang Province to Comprehensive Utilisation of Straw in 2020                                            |
| Jilin        | 1      | 2013 | Notice on Prohibiting Open Burning of Crop Straw                                                                                       |
|              | 2      | 2014 | Notice on Further Promoting the Banning of Straw Burning in Autumn and Winter                                                          |
|              | 3      | 2016 | Instructions on Promoting the Comprehensive Utilization of Crop Straws                                                                 |
|              | 4      | 2017 | Decision on the Prohibition of Open Burning and Comprehensive Utilization of Crop Straw                                                |
|              | 5      | 2018 | Work Plan for Banning Straw Burning in Autumn and Winter in Jilin Province 2018                                                        |
|              | 6      | 2019 | Notice on Enhancing Straw Programme Burning and Removal Work                                                                           |
|              | 7      | 2020 | 2020 Autumn and Winter Key Areas Straw Burning Control Package Assistance Program                                                      |
| Liaoning     | 1      | 2016 | Implementation Opinions on Promoting Comprehensive Utilization of Crop Straw and Banning Burning Work (2016-2018)                      |
|              | 2      |      | Liaoning Province 2017-2018 Autumn and Winter Comprehensive Air Pollution Control and Tackling Action Supervision Programme            |
|              | 3      | 2018 | Liaoning Province Straw Burning Prevention and Control Responsibility Measures                                                         |
|              | 4      | 2020 | Straw Burning Control Work Programme for Liaoning Province during 2020-2021                                                            |

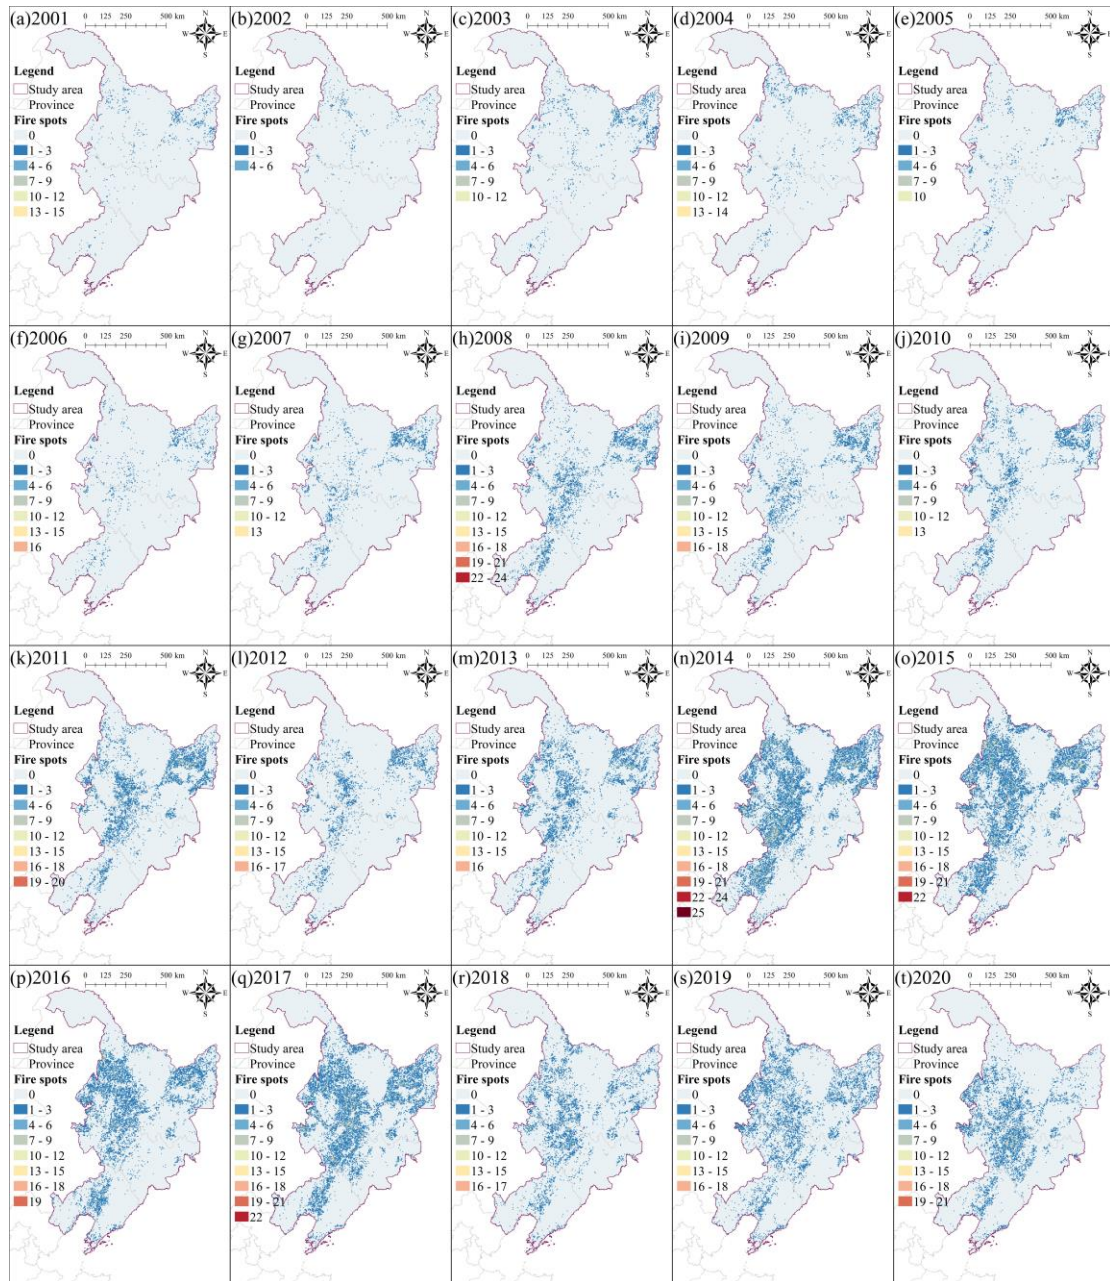

38

39 **Fig. S1** The spatial distribution of annual fire spots from open straw burning in

40 Northeast China from 2001 to 2020

41

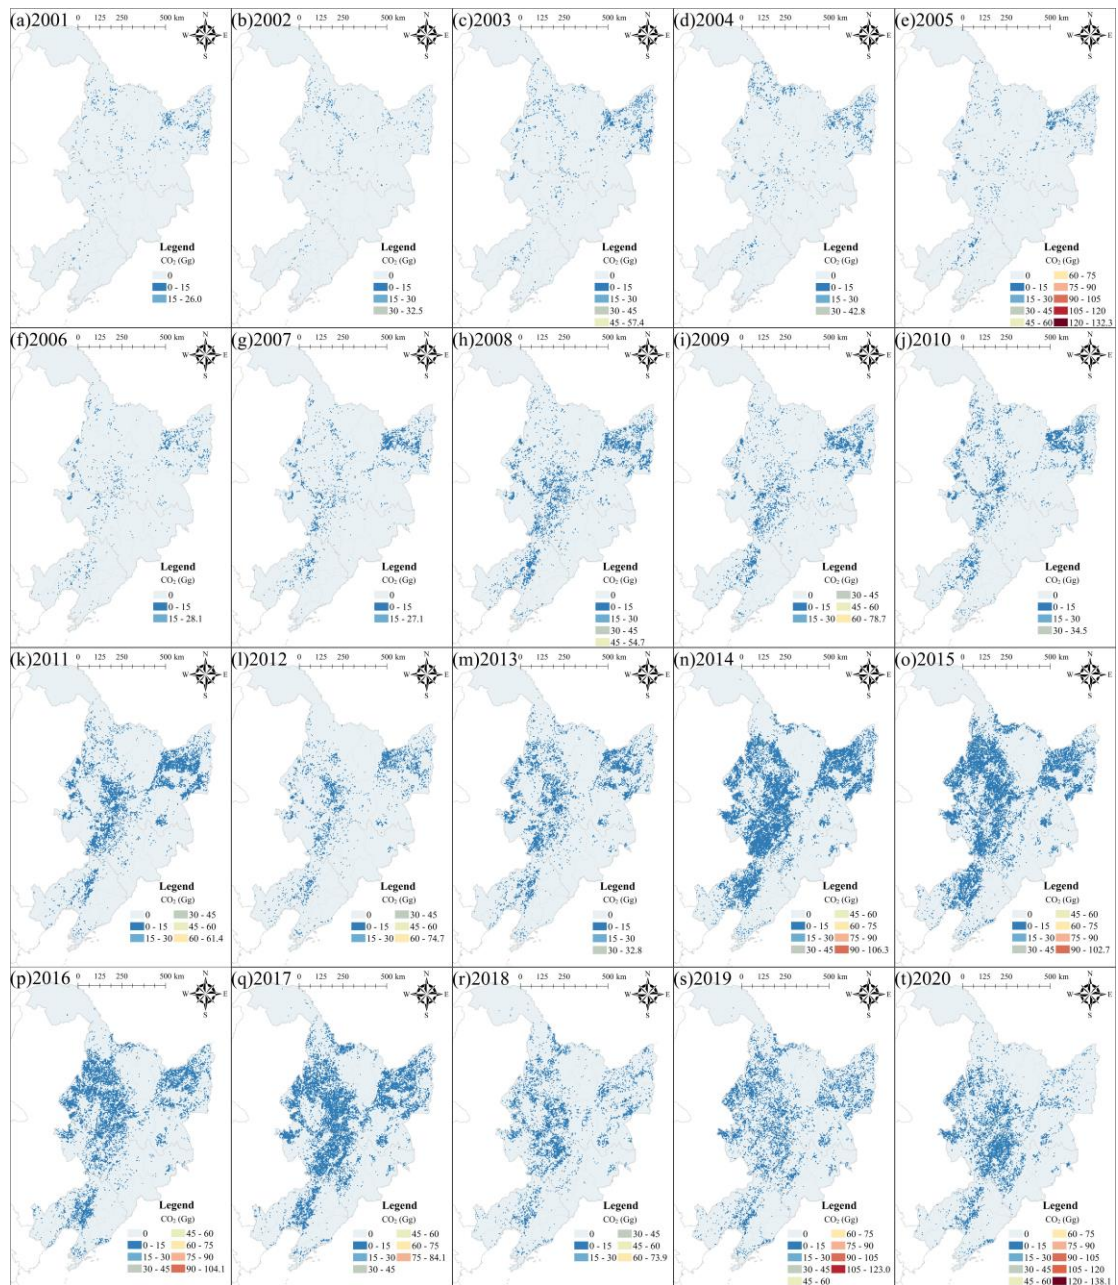

42

43 **Fig. S2** The annual CO<sub>2</sub> emission inventory from open straw burning in Northeast

44 China from 2001 to 2020

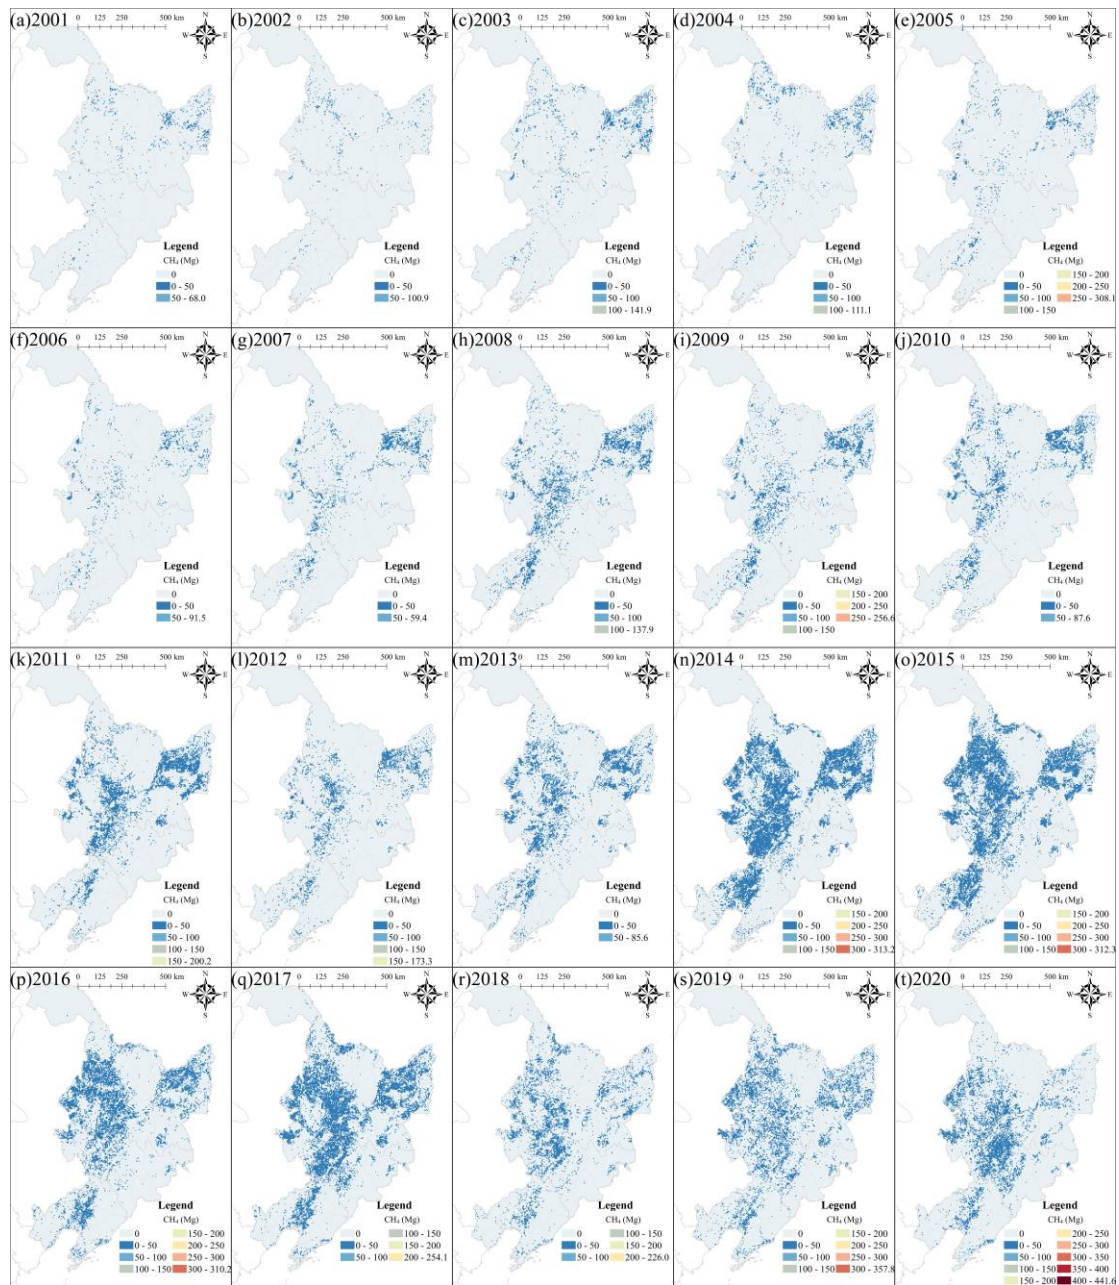

45

46 **Fig. S3** The annual CH<sub>4</sub> emission inventory from open straw burning in Northeast

47 China from 2001 to 2020

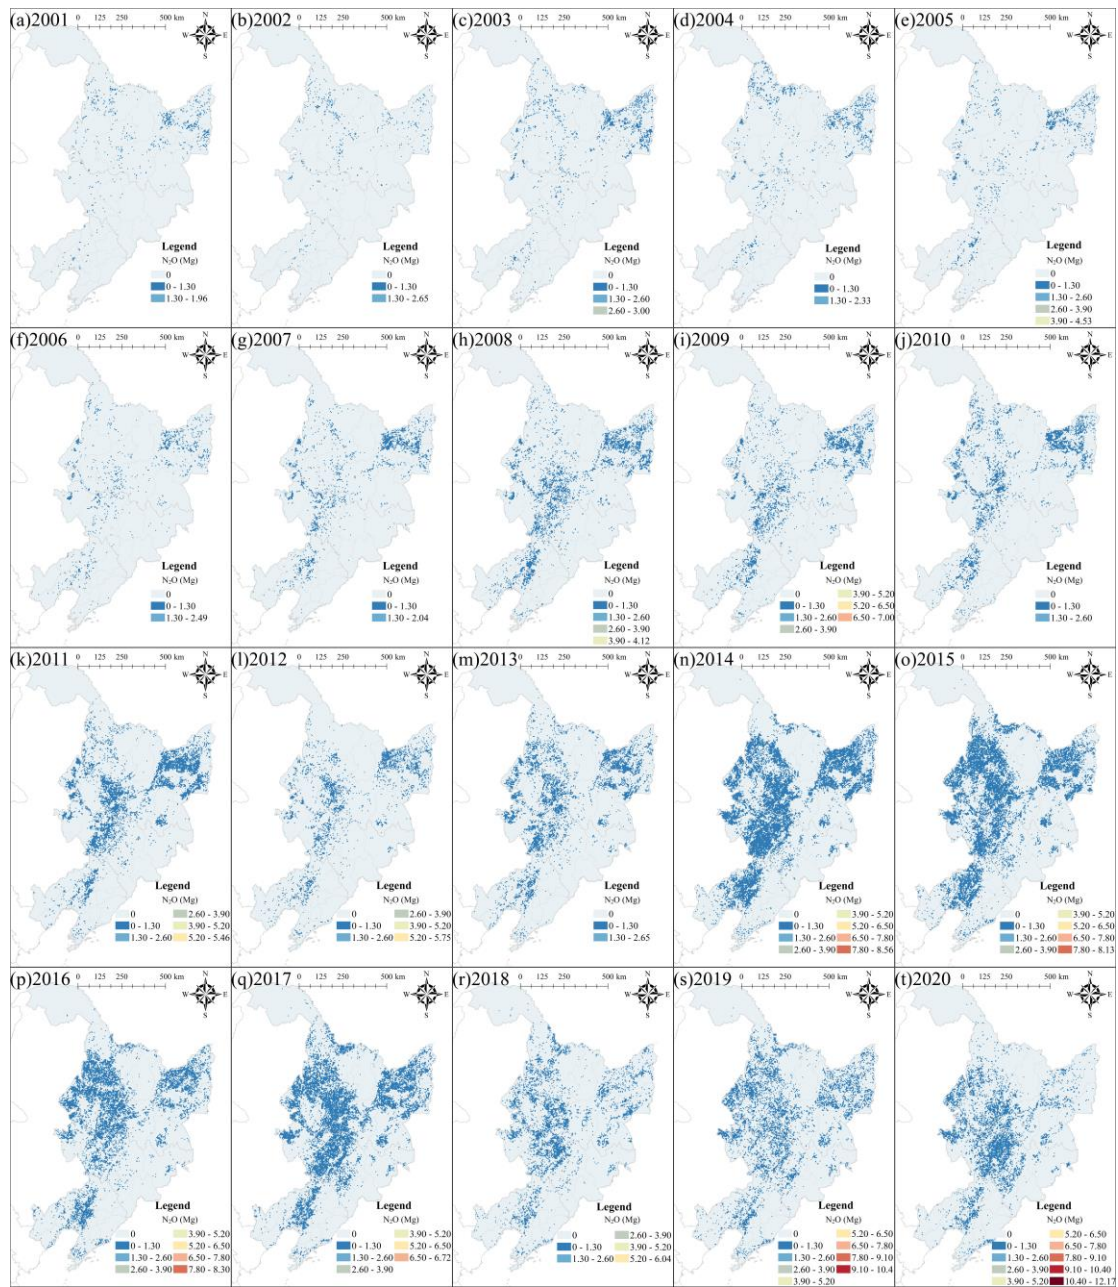

48

49 **Fig. S4** The annual  $N_2O$  emission inventory from open straw burning in Northeast

50 China from 2001 to 2020

51

52

53

54



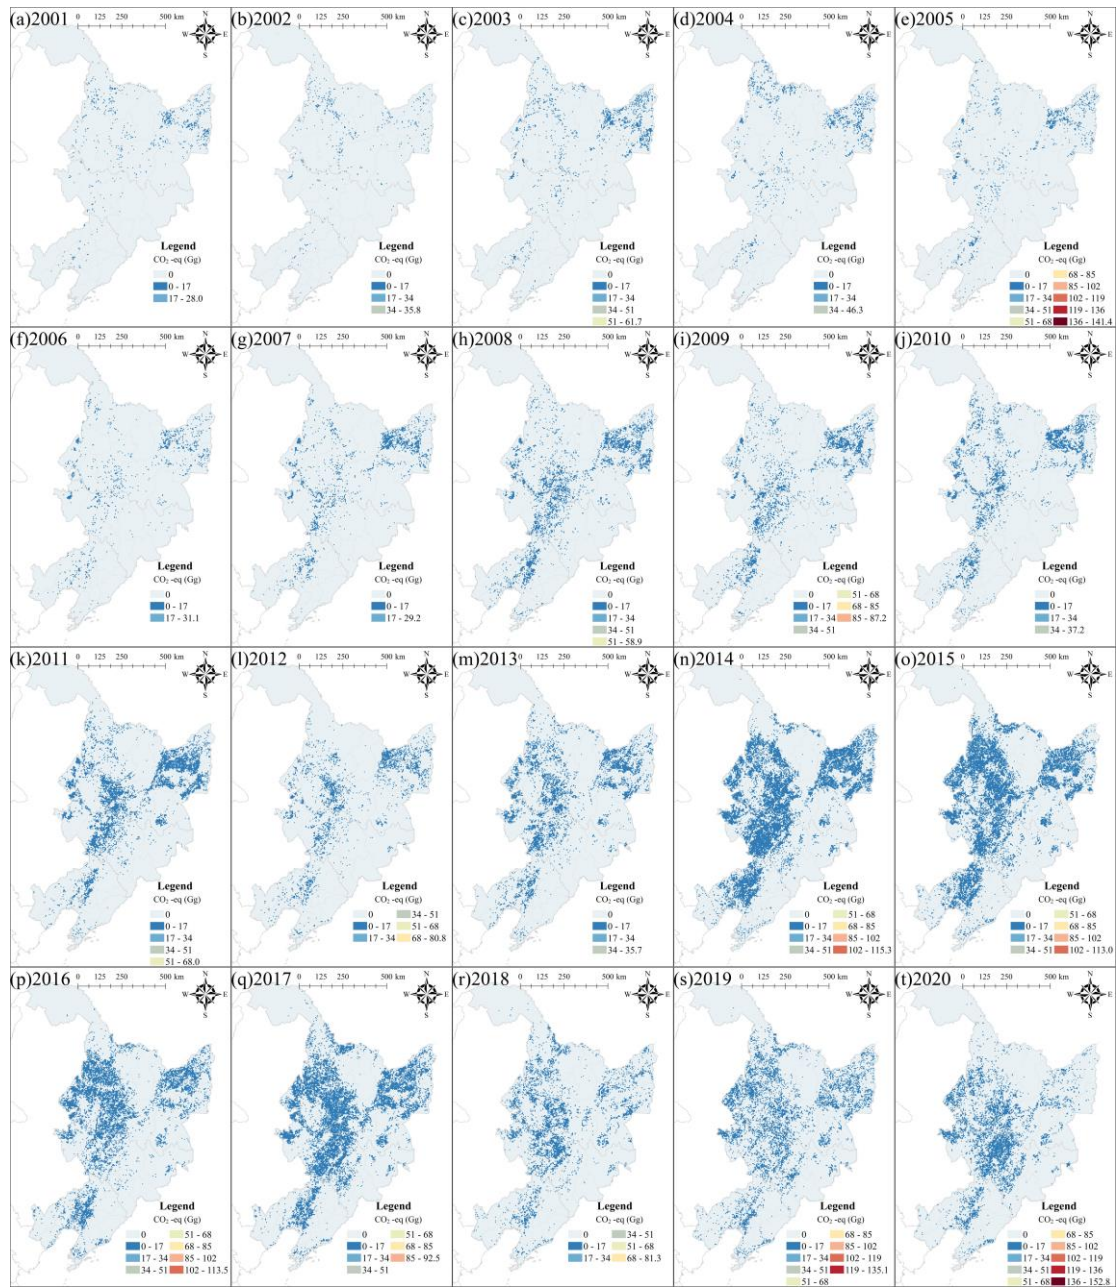

55

56 **Fig. S5** The annual CO<sub>2</sub>-eq emission inventory from open straw burning in Northeast

57 China from 2001 to 2020.
